# Supplementary material for: Chemical Component and Proteomic Study of the Amphibalanus (= Balanus) amphitrite Shell
Source: PubMed Central journal article supplement (PMC4519255; doi:10.1371/journal.pone.0133866), 2015-07-29
Supplement: pone.0133866.s004.pdf [file pone.0133866.s004.pdf]

**Table S1.** Proteins identified in the Amphibalanus amphitrite shell. The Genbank access number and protein description identify protein matches from the NCBI database. The NCBI score and E-value are obtained from the tBLASTx searching. The protein score is derived from the combined scores of all observed mass spectra that can be matched to amino acid sequences within that protein. Protein matches gives the number of mass spectra assigned to this protein. ✓ means present in that fraction.

| Contig number                                                       | Function discription                                    | NCBI number   | NCBI score | NCBI E-value | Protein score | Peptide matches | Fraction    |        |         |
|---------------------------------------------------------------------|---------------------------------------------------------|---------------|------------|--------------|---------------|-----------------|-------------|--------|---------|
|                                                                     |                                                         |               |            |              |               |                 | Acetic acid | 1% SDS | 10% SDS |
| <b>Chromatin structure and dynamics</b>                             |                                                         |               |            |              |               |                 |             |        |         |
| Unigene28047_Ba_mix                                                 | histone-lysine N-methyltransferase<br>MLL2-like         | XP002935167.1 | 90.1       | 6.E-17       | 156           | 11              | ✓           |        |         |
| <b>Energy production and conversion</b>                             |                                                         |               |            |              |               |                 |             |        |         |
| CL215.Contig2_Ba_mix                                                | F0F1-type ATP synthase, beta subunit                    | XP001996493.1 | 847        | 0.E+00       | 48            | 4               |             |        | ✓       |
| CL15717.Contig1_Ba_mix                                              | Iron binding protein involved in Fe-S cluster formation | XP002739643.1 | 175        | 1.E-42       | 35            | 5               | ✓           |        |         |
| <b>Amino acid transport and metabolism</b>                          |                                                         |               |            |              |               |                 |             |        |         |
| CL1641.Contig1_Ba_mix                                               | serine proteinase-like protein                          | ABD62888.1    | 287        | 2.E-75       | 205           | 10              |             | ✓      | ✓       |
| CL200.Contig3_Ba_mix                                                | serine proteinase-like protein                          | ABD62888.1    | 348        | 8.E-94       | 120           | 13              |             | ✓      | ✓       |
| CL389.Contig2_Ba_mix                                                | pacifastin light chain precursor                        | AAC64661.1    | 80.1       | 2.E-13       | 38            | 8               | ✓           |        |         |
| <b>Lipid transport and metabolism</b>                               |                                                         |               |            |              |               |                 |             |        |         |
| CL775.Contig1_Ba_mix                                                | vitellogenin 2                                          | ACJ12892.1    | 327        | 4.E-87       | 2241          | 397             |             | ✓      | ✓       |
| CL775.Contig2_Ba_mix                                                | vitellogenin                                            | BAJ33507.1    | 233        | 4.E-59       | 991           | 169             |             | ✓      | ✓       |
| CL565.Contig1_Ba_mix                                                | vitellogenin 2                                          | ACJ12892.1    | 246        | 5.E-82       | 824           | 77              |             | ✓      | ✓       |
| <b>Posttranslational modification, protein turnover, chaperones</b> |                                                         |               |            |              |               |                 |             |        |         |
| CL68.Contig2_Ba_mix                                                 | Settlement inducing protein complex                     | AAR33079.1    | 2979       | 0.E+00       | 425           | 68              |             | ✓      | ✓       |
| CL17587.Contig1_Ba_mix                                              | Alpha-macroglobulin                                     | EFN79621.1    | 573        | 0.E+00       | 164           | 26              |             |        | ✓       |

| Contig number                           | Function discription                                                        | NCBI number   | NCBI score | NCBI E-value | Protein score | Peptide matches | Fraction    |        |         |  |
|-----------------------------------------|-----------------------------------------------------------------------------|---------------|------------|--------------|---------------|-----------------|-------------|--------|---------|--|
|                                         |                                                                             |               |            |              |               |                 | Acetic acid | 1% SDS | 10% SDS |  |
| Unigene28512_Ba_mix                     | Basement membrane-specific heparan sulfate proteoglycan (HSPG) core protein | EFN62243.1    | 222        | 1.E-56       | 249           | 17              |             |        | ✓       |  |
| CL1258.Contig1_Ba_mix                   | AGAP003656-PA                                                               | XP_972068.2   | 382        | 1.E-172      | 122           | 3               |             |        | ✓       |  |
| CL7049.Contig1_Ba_mix                   | Basement membrane-specific heparan sulfate proteoglycan (HSPG) core protein | EFN62243.1    | 211        | 8.E-53       | 112           | 9               |             |        | ✓       |  |
| CL7056.Contig1_Ba_mix                   | papilin-like                                                                | XP001601735.2 | 189        | 1.E-46       | 112           | 6               | ✓           |        |         |  |
| CL6376.Contig1_Ba_mix                   | GA22193                                                                     | XP002136422.1 | 126        | 2.E-27       | 119           | 6               | ✓           |        |         |  |
| Unigene7974_Ba_mix                      | similar to AGAP003656-PA                                                    | XP972068.2    | 273        | 9.E-72       | 65            | 8               |             |        | ✓       |  |
| CL5577.Contig1_Ba_mix                   | chorionic proteinase inhibitor                                              | BAC00855.1    | 124        | 5.E-27       | 35            | 11              | ✓           |        |         |  |
| <b>General function prediction only</b> |                                                                             |               |            |              |               |                 |             |        |         |  |
| CL8390.Contig1_Ba_mix                   | Chorion peroxidase-like                                                     | XP001946672.2 | 440        | 1.E-121      | 1375          | 377             | ✓           | ✓      | ✓       |  |
| Unigene8560_Ba_mix                      | Carboxylesterase and related proteins                                       | NP001136104.1 | 75.9       | 2.E-12       | 294           | 29              |             |        | ✓       |  |
| Unigene27659_Ba_mix                     | carbonic anhydrase 2                                                        | NP001182637.1 | 113        | 2.E-23       | 102           | 16              |             | ✓      | ✓       |  |
| CL15286.Contig1_Ba_mix                  | alpha-carbonic anhydrase                                                    | EFX81683.1    | 123        | 2.E-26       | 127           | 4               | ✓           | ✓      | ✓       |  |
| CL10121.Contig1_Ba_mix                  | alpha-carbonic anhydrase                                                    | EFX88013.1    | 149        | 5.E-34       | 69            | 9               |             | ✓      | ✓       |  |
| <b>Signal transduction mechanisms</b>   |                                                                             |               |            |              |               |                 |             |        |         |  |
| CL14971.Contig1_Ba_mix                  | mannose-binding protein                                                     | AAX55747.1    | 111        | 1.E-22       | 235           | 59              | ✓           | ✓      | ✓       |  |
| CL333.Contig5_Ba_mix                    | AGAP003027-PA                                                               | EAA07856.5    | 396        | 1.E-108      | 150           | 10              | ✓           |        |         |  |
| Unigene5283_Ba_mix                      | mannose-binding protein                                                     | ADF27340.1    | 78.6       | 1.E-13       | 93            | 3               |             | ✓      |         |  |
| Unigene22882_Ba_mix                     | STE20-like serine/threonine-protein kinase-like isoform 3                   | XP003401043.1 | 582        | 1.E-164      | 47            | 22              | ✓           |        |         |  |
| Unigene22883_Ba_mix                     | STE20-like serine/threonine-protein kinase-like isoform 3                   | XP003401043.1 | 376        | 1.E-102      | 49            | 20              | ✓           |        |         |  |
| <b>Defense mechanisms</b>               |                                                                             |               |            |              |               |                 |             |        |         |  |

| Contig number                                                     | Function discription                                    | NCBI number   | NCBI score | NCBI E-value | Protein score | Peptide matches | Fraction    |        |         |
|-------------------------------------------------------------------|---------------------------------------------------------|---------------|------------|--------------|---------------|-----------------|-------------|--------|---------|
|                                                                   |                                                         |               |            |              |               |                 | Acetic acid | 1% SDS | 10% SDS |
| Unigene23219_Ba_mix                                               | sushi, nidogen and EGF-like domain-containing protein 1 | XP002750027.1 | 58.2       | 2.E-07       | 192           | 22              | ✓           |        |         |
| <b>Extracellular structures</b>                                   |                                                         |               |            |              |               |                 |             |        |         |
| CL9487.Contig1_Ba_mix                                             | similar to Fraser syndrome 1 isoform 1                  | XP535623.2    | 73.6       | 1.E-11       | 160           | 4               | ✓           |        |         |
| CL4062.Contig1_Ba_mix                                             | Prisilkin-39                                            | C0J7L8        | 72.4       | 8.E-12       | 151           | 6               | ✓           | ✓      | ✓       |
| CL6615.Contig1_Ba_mix                                             | acetic shell matrix protein                             | BAD00044.1    | 333        | 1.E-89       | 70            | 3               | ✓           |        |         |
| <b>Cytoskeleton</b>                                               |                                                         |               |            |              |               |                 |             |        |         |
| CL3592.Contig1_Ba_mix                                             | Actin                                                   | CAB99474.1    | 762        | 0.E+00       | 502           | 101             |             | ✓      | ✓       |
| Unigene32973_Ba_mix                                               | Actin                                                   | XP623487.2    | 424        | 1.E-117      | 273           | 64              |             |        | ✓       |
| Unigene11591_Ba_mix                                               | Myosin class II heavy chain                             | XP003395921.1 | 1135       | 0            | 47            | 14              |             |        | ✓       |
| CL158.Contig4_Ba_mix                                              | beta-tubulin                                            | XP002110118.1 | 900        | 0            | 32            | 7               |             |        | ✓       |
| CL1283.Contig1_Ba_mix                                             | Titin                                                   | EFN80688.1    | 892        | 0            | 63            | 29              | ✓           |        |         |
| CL352.Contig1_Ba_mix                                              | Talin-1                                                 | EGI67012.1    | 3195       | 0            | 54            | 16              | ✓           |        |         |
| CL6344.Contig2_Ba_mix                                             | Myosin class II heavy chain                             | XP003397476.1 | 3014       | 0            | 55            | 25              | ✓           |        |         |
| <b>Cell cycle control, cell division, chromosome partitioning</b> |                                                         |               |            |              |               |                 |             |        |         |
| CL1818.Contig1_Ba_mix                                             | Mki67 protein                                           | AAI21193.1    | 191        | 1.E-46       | 44            | 34              |             |        | ✓       |
| <b>Function unknown</b>                                           |                                                         |               |            |              |               |                 |             |        |         |
| Unigene27606_Ba_mix                                               | Basic proline-rich protein                              | Q95JC9        | 216        | 3.E-54       | 612           | 119             | ✓           | ✓      | ✓       |
| Unigene27724_Ba_mix                                               | Hypothetical protein                                    | --            | --         | --           | 190           | 11              | ✓           | ✓      | ✓       |
| Unigene28390_Ba_mix                                               | Hypothetical protein                                    | --            | --         | --           | 119           | 4               |             | ✓      |         |
| CL2023.Contig1_Ba_mix                                             | GE11827                                                 | XP002092149.1 | 108        | 4.E-22       | 149           | 6               | ✓           |        |         |
| CL5140.Contig1_Ba_mix                                             | AGAP002085-PA                                           | XP320958.3    | 86.3       | 2.E-15       | 119           | 11              | ✓           |        |         |
| Unigene5172_Ba_mix                                                | Hypothetical protein CBG20711                           | XP002631543.1 | 76.6       | 1.E-12       | 87            | 3               | ✓           |        |         |
| Unigene30333_Ba_mix                                               | Hypothetical protein                                    | --            | --         | --           | 61            | 6               | ✓           | ✓      |         |
| CL3876.Contig2_Ba_mix                                             | CG2839                                                  | NP608540.1    | 101        | 5.E-20       | 61            | 5               | ✓           |        |         |
| Unigene10933_Ba_mix                                               | Hypothetical protein                                    | --            | --         | --           | 47            | 8               | ✓           |        |         |

| Contig number         | Function discription | NCBI number   | NCBI score | NCBI E-value | Protein score | Peptide matches | Fraction    |        |         |
|-----------------------|----------------------|---------------|------------|--------------|---------------|-----------------|-------------|--------|---------|
|                       |                      |               |            |              |               |                 | Acetic acid | 1% SDS | 10% SDS |
| Unigene20930_Ba_mix   | Hypothetical protein | --            | --         | --           | 45            | 3               | ✓           |        |         |
| Unigene27308_Ba_mix   | Hypothetical protein | --            | --         | --           | 41            | 8               |             |        | ✓       |
| CL6664.Contig1_Ba_mix | CBG02561             | XP002630848.1 | 107        | 2.E-21       | 56            | 12              |             | ✓      | ✓       |
