# Supplementary material for: Chemical Component and Proteomic Study of the Amphibalanus (= Balanus) amphitrite Shell
Source: PubMed Central journal article supplement (PMC4519255; doi:10.1371/journal.pone.0133866), 2015-07-29
Supplement: pone.0133866.s005.pdf [file pone.0133866.s005.pdf]

**Table S2.** Amino acid composition of the Asp-rich shell matrix protein from *Amphibalanus amphitrite*, Asprich from *Atrina rigida* and Aspein from *Pinctada fucata*.

| Amino acid | Asp-rich shell matrix prtein ( <i>A. amphitrite</i> ) | Asprich ( <i>A. rigida</i> ) | Aspein ( <i>P. fucata</i> ) |
|------------|-------------------------------------------------------|------------------------------|-----------------------------|
| Ala        | 5.8                                                   | 13.6                         | 6.3                         |
| Arg        | 0.3                                                   | 0.4                          | 0.0                         |
| Asn        | 3.9                                                   | 2.7                          | 0.5                         |
| Asp        | 41.2                                                  | 48.6                         | 57.6                        |
| Cys        | 0.0                                                   | 0.0                          | 0.2                         |
| Gln        | 1.8                                                   | 0.4                          | 0.5                         |
| Glu        | 21.8                                                  | 11.7                         | 1.5                         |
| Gly        | 14.2                                                  | 5.4                          | 15.5                        |
| His        | 0.0                                                   | 0.4                          | 0.0                         |
| Ile        | 0.5                                                   | 1.2                          | 0.5                         |
| Leu        | 0.3                                                   | 2.3                          | 1.0                         |
| Lys        | 1.6                                                   | 1.2                          | 0.2                         |
| Met        | 0.0                                                   | 0.4                          | 0.5                         |
| Phe        | 0.3                                                   | 0.4                          | 0.2                         |
| Pro        | 0.3                                                   | 1.2                          | 0.5                         |
| Ser        | 4.5                                                   | 5.8                          | 12.8                        |
| Thr        | 0.3                                                   | 0.8                          | 0.7                         |
| Trp        | 0.0                                                   | 0.0                          | 0.0                         |
| Tyr        | 1.8                                                   | 0.0                          | 0.0                         |
| Val        | 1.6                                                   | 3.5                          | 1.5                         |
| Pyl        | 0.0                                                   | 0.0                          | 0.0                         |
| Sec        | 0.0                                                   | 0.0                          | 0.0                         |
